# Supplementary material for: Analysis of a cellulose synthase catalytic subunit from the oomycete pathogen of crops Phytophthora capsici
Source: Springer Nature journal article supplement (doi:10.1007/s10570-020-03362-9), 2020-08-03
Supplement: MOESM1 [file 18244412]

## Supplementary Material

### Analysis of a cellulose synthase catalytic subunit from the oomycete pathogen of crops *Phytophthora capsici*

Zhili Pang<sup>1,2</sup>, Lauren S. McKee<sup>1,3</sup>, Vaibhav Srivastava<sup>1</sup>, Stefan Klinger<sup>1</sup>, Sara M. Díaz-Moreno<sup>1</sup>, Peter Orlean<sup>4</sup>, Xili Liu<sup>2\*</sup> and Vincent Bulone<sup>1,5\*</sup>

**Table S1. Primer pairs used to assess the mycelial RNA transcript abundance of the four cellulose synthase genes from *Phytophthora capsici*.**

| Gene           | Primer Sequence (5'-3')                                        | Amplicon size (bp) |
|----------------|----------------------------------------------------------------|--------------------|
| <i>PcCesA1</i> | Forward: TATGAGATGTACGCGACGCC<br>Reverse: GTCGGAATTGACTGGACGGT | 111                |
| <i>PcCesA2</i> | Forward: CGTACAATGTTTCCGCGACC<br>Reverse: ACGCCTAGAGCGAACGTAAG | 90                 |
| <i>PcCesA3</i> | Forward: CGGTGTCTCCCGTCTTATCG<br>Reverse: CATGCCCTTTAGAGCAGCCT | 94                 |
| <i>PcCesA4</i> | Forward: AAGGGGCGATTCAGTTACCG<br>Reverse: TCGCACGGTTCAATACCCAA | 107                |

**Table S2. *Saccharomyces cerevisiae* strains used in this study.**

| Strain            | Genotype                                                                                      | Source                        |
|-------------------|-----------------------------------------------------------------------------------------------|-------------------------------|
| BY4742            | $\alpha$ <i>his3Δ1 leu2Δ0 lys2Δ0 ura3Δ0</i>                                                   | ATCC, Manassa, Virginia (USA) |
| 4015251           | $\alpha$ <i>his3Δ1 leu2Δ0 lys2Δ0 ura3Δ0 fks1Δ::KanMX4</i>                                     | ATCC, Manassa, Virginia (USA) |
| SK28 <sup>a</sup> | $\alpha$ <i>his3Δ1 leu2Δ0 lys2Δ0 ura3Δ0 fks1Δ::KanMX4 gsy2Δ::LEU2</i>                         | This study                    |
| SK16 <sup>a</sup> | $\alpha$ <i>his3Δ1 leu2Δ0 lys2Δ0 ura3Δ0 fks1Δ::KanMX4 gsy2Δ::LEU2 pep4Δ::LYS2</i>             | This study                    |
| SK17 <sup>a</sup> | $\alpha$ <i>his3Δ1 leu2Δ0 lys2Δ0 ura3Δ0 fks1Δ::KanMX4 gsy2Δ::LEU2 pep4Δ::LYS2 gsy1Δ::HIS3</i> | This study                    |

<sup>a</sup>Derived from strain 4015251

**Table S3. Primers used for the generation of mutant *Saccharomyces cerevisiae* strains.**

| <b>Primer</b>          | <b>Sequence (5'→3')</b>                                                     | <b>Purpose</b>                                          |
|------------------------|-----------------------------------------------------------------------------|---------------------------------------------------------|
| GSY2_grcF              | AACTGTGATTGAAGTTTTGACTACCTC<br>AGAGAAAAATTTTGAATGCGTTTCGGT<br>GATGAC        | GRC amplification                                       |
| GSY2_grcR              | CTTTATGGTAAGATTTTTTTAATACTGT<br>TTATATCCTCATAGGATTTACTTACGC<br>ATCTGTGCG    | GRC amplification                                       |
| GSY2_seqF              | TATCATGCCAGGCAGGACAG                                                        | Verification of disruption                              |
| GSY2_seqR              | CAACTGCAGCTCTGGTAGCG                                                        | Verification of disruption                              |
| GSY2_seqR<br>2         | AGGTTTCCTTGGGTTTGTTC                                                        | Verification of disruption                              |
| HIS3_seqF <sup>a</sup> | GCTGAAACGCAAGGATTG                                                          | Verification of genomic<br>locus for auxotrophic marker |
| HIS3_seqR <sup>a</sup> | GCTGGGTAAGGATGATGC                                                          | Verification of genomic<br>locus for auxotrophic marker |
| PEP4_grcF              | TAGTATTTAATCCAAATAAAATTCAAA<br>CAAAAACCAAACTAACATGAGCAGA<br>TTGTAAGGAGAGTG  | GRC amplification                                       |
| PEP4_grcR              | AGATGGCAGAAAAGGATAGGGCAGGAG<br>AAGTAAGAAAAGTTTAGCTCATTCTCC<br>TTACGCATCTGTG | GRC amplification                                       |
| PEP4_seqF              | GAAGTTTGGGTAATTCGCTGCT                                                      | Verification of disruption                              |
| PEP4_seqR              | GGGCTACCCGCATATAATGAC                                                       | Verification of disruption                              |
| PEP4_seqR2             | GACAGGTGTTGATTGGTCTAATGG                                                    | Verification of disruption                              |
| LYS2_seqF <sup>a</sup> | CTTCCTGGTTGATGGTCAC                                                         | Verification of genomic<br>locus for auxotrophic marker |
| LYS2_seqR <sup>a</sup> | TGCGAGGTTTTCTTGGTC                                                          | Verification of genomic<br>locus for auxotrophic marker |
| GSY1_grcF              | GCTCACCAAGCTCTTAAAACGACTTCG<br>CTGTGATGCTGC                                 | GRC amplification                                       |
| GSY1_grcR              | TTCTTTTTTTTTCTCTTGAAGCTCGAAAC<br>CATCTTAACTTCTGCTAACATATCTT                 | GRC amplification                                       |
| GSY1_seqF              | AACAATGACAAGCCACAAGAC                                                       | GRC amplification and<br>verification of disruption     |
| GSY1_seqR              | GAGCCTGCCGGCTTATAGAG                                                        | GRC amplification and<br>verification of disruption     |
| GSY1_seqR<br>2         | GATCGCAATCTGAATCTTGG                                                        | Verification of disruption                              |
| LEU2_seqF <sup>a</sup> | GCTGAAACGCAAGGATTG                                                          | Verification of genomic<br>locus for auxotrophic marker |
| LEU2_seqR <sup>a</sup> | GCTGGGTAAGGATGATGC                                                          | Verification of genomic<br>locus for auxotrophic marker |

<sup>a</sup>Primers for verification of dysfunctional genomic loci for auxotrophic marker genes were designed to bind outside the marker gene sequence used for replacement of the target genes by gene replacement cassettes (GRCs).

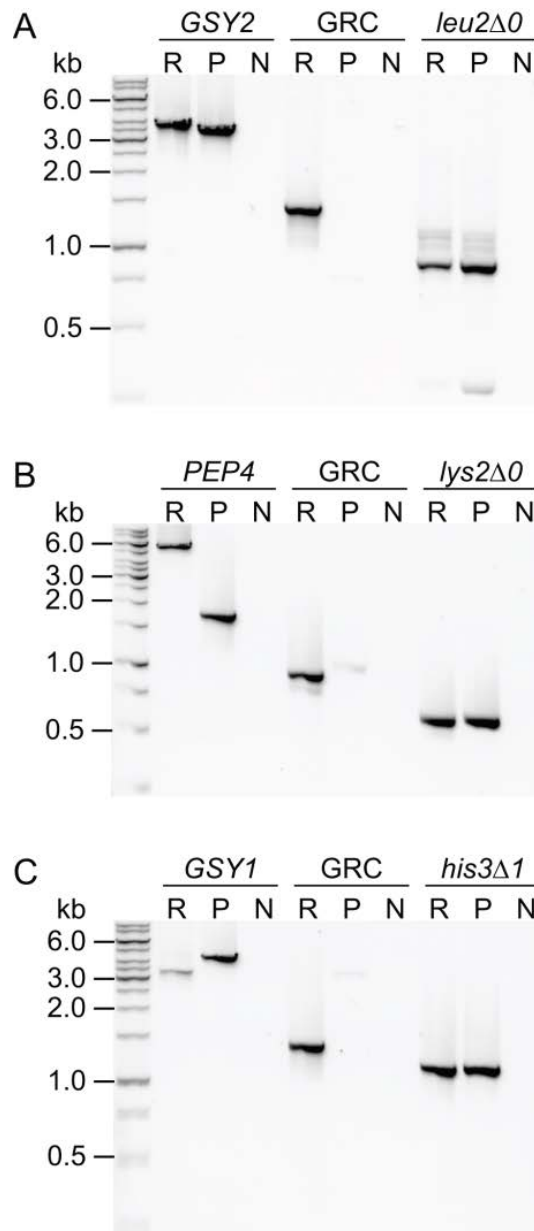

**Figure S1. Construction of the yeast glucosyltransferase mutant (LoGSA).**

Replacement of the target genes *GSY2* (panel A), *PEP4* (panel B), and *GSY1* (panel C) as well as integrity of dysfunctional genomic loci for the auxotrophic marker genes *leu2Δ0* (panel A), *lys2Δ0* (panel B), and *his3Δ1* (panel C) were verified by agarose gel electrophoresis of PCR products. For each gene replacement, three DNA fragments were amplified from genomic DNA of the parental strain to be transformed (P), the replacement-carrying strain (R) and a non-template control (N): a DNA fragment spanning the entire target gene locus, a gene replacement cassette (GRC)-specific DNA fragment, and a DNA fragment spanning the entire marker gene locus.

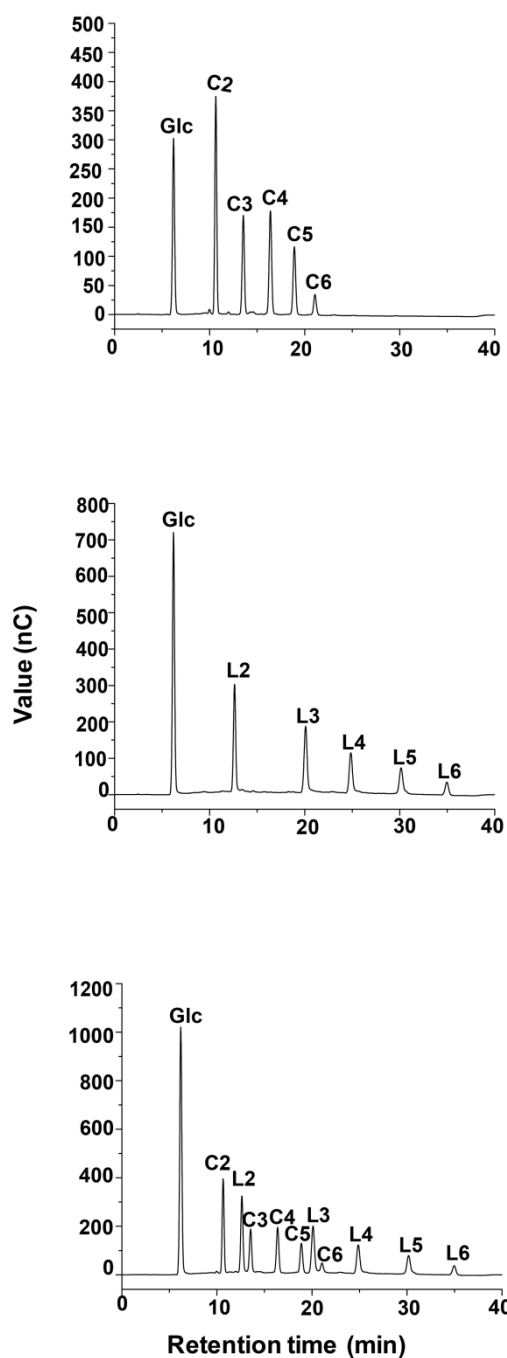

**Figure S2. Chromatographic separation of standard cellooligosaccharides ( $\beta$ -1,4-linkages) and laminarioligosaccharides ( $\beta$ -1,3-linkages) by HPAEC-PAD.**

Commercial standards of  $\beta$ -glucan oligosaccharides with  $\beta$ -1,4 linkages (cellobiose, cellotriose, cellotetraose, cellopentaose and cellohexaose) were analyzed by HPAEC-PAD to verify their chromatographic separation from commercial standards of  $\beta$ -glucan oligosaccharides with  $\beta$ -1,3 linkages (laminaribiose, laminaritriose, laminaritetraose, laminaripentaose and laminarihexaose). The different standards separate well, allowing the identification of the products formed by the recombinant *PcCesA1* by comparing retention times with these standards.

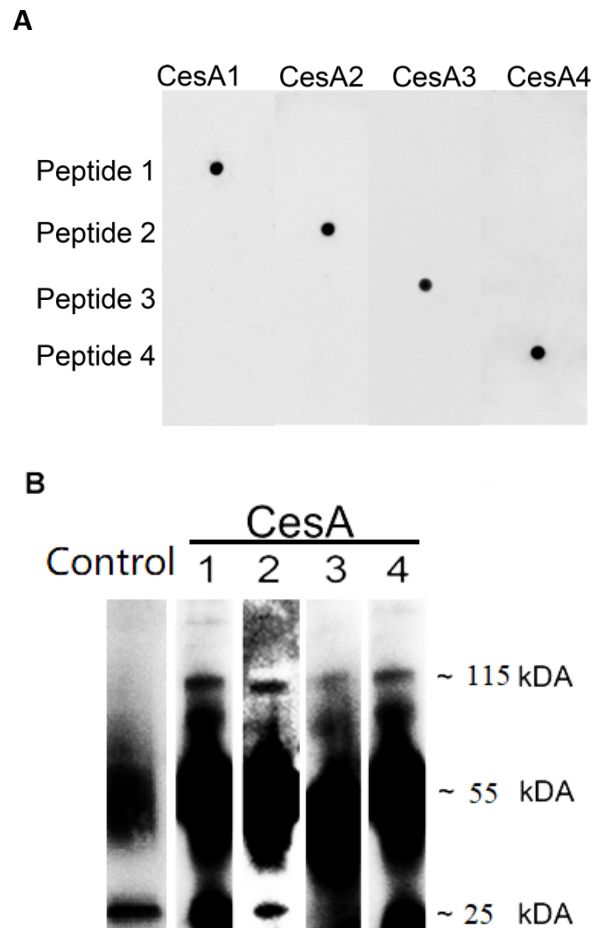

**Figure S3. Dot blot analysis showing the specificity of the anti-*PcCesA1*, anti-*PcCesA2*, anti-*PcCesA3* and anti-*PcCesA4* antibodies (A), and immunoprecipitation analysis of the four CesA proteins from *P. capsici* (B).**

(A) Unique peptides from each CesA proteins were used to raise anti-*PcCesA* monoclonal antibodies. The specific peptides were: *PcCesA1*-peptide 1 (SAMDIRQPGE), *PcCesA2*-peptide 2 (NKGILETAGD), *PcCesA3*-peptide 3(AVLSNVAFTSLQDGG) and *PcCesA4*-peptide 4 (ANRQPPGLGA). (B) Western blot performed on the proteins immunoprecipitated by the anti-*PcCesA1* antibody. The different lanes were probed using the anti-*PcCesA1*, anti-*PcCesA2*, anti-*PcCesA3* and anti-*PcCesA4* antibodies as indicated at the top of the figure. Control: negative control performed in the absence of primary antibody. The CesA proteins detected by the antibodies have an apparent molecular mass of 115 kDa. The heavy and light chains of the mouse anti-CesA1 monoclonal antibodies detected by the secondary antibodies have a heterogeneous apparent molecular weight (due to glycosylation) centred around 55 and 25 kDa, respectively.

### PcCesA1 (Cellulose synthase A1)

#### >PcCesA1

MFNKDQPVAV PPTDDYEMYA TPSAMDIRQP GETEIVRRSG SPDPHHRPVN SDEGGSFQDN  
VITVHGYMHK QGKRAIKGPL HSKWKRRYFA LEKAKIYYFH SHLECRQYFT TR**NTDLVVGA**  
**IELK**DALQLR PCARLDLPHR GFEIMTKRRV WVLCPETEEE YRLWFEGVEE AIVACGSGNI  
IERKLPNVRK YYMKGITTYR FLYFLFLILS VVEIFGFVFW FVVGTPCDS GNRTLACEDV  
YDNTPDDLNC LAEPMSGWFT PPDWYLTLAG VDDVVCFHNP PIAQWVSFFA LIVAEELVSMV  
LGSLYYLGWV KPVRRGAHYF DEFDPKVPDD LWPKIDVLLC HYSEPAEETI DTLMACMNLQ  
YPPHLLQIYV LDDGYCSTKW TKGPNVPAIE LNKVVLEKSG DLRQEVAQFM YDRVCDPNED  
MEVYAWRKLH SSANLPSASR PKVVNRADCA VGSFRDDYRY PGLPHVTYVG RVKPEMHYSK  
AGNINNCLYN EGANGRYMLL LDSMQPHPK **FILATLPFFF DEDRQYK**NK YSCSCTGCQN  
VAKMCCASCK IAGVPEERIS YCSKECFENA MHVQSDLHRR QVNGTLDVDR ATKKELRCMN  
CDSKLGKSGV CRKCNNTNNNN GDTDVQILHT YSDVDR **DNAV GFVQTPQYFR** DCVQLQIGDP  
LGHNRSTFYD AIQTGQDGYD CASFAGTNAL IRREALDSIG GIQYGTLTED CYTGERLVSM  
GWKALYFRKD FEGEAEERVR **LAEGLIPDSV AGAMAQR**KRW AKGNFQTALM KKNKNVTDPE  
WKRPHVDIPK YRKPSNFMRV VFYLNSTLYP IDSIPVILLY YITLYFLYTG YAPIFVNGLR  
ILVALVPK **LI VQGLLSALST RGVENNDVVR** SQETRFVYAF TNFTAMLGAI VWKFTGRKSR  
WLNKRDATRG SLAELPNVLV FSGAVFGIIW AMVRYIVAYY NRVYSHGDSM LCAAAILMGFY  
IAYNLGPSVR MSIQEYFGWS YQSLMDQGNF MGSISIAVGL MFIALWVHVE KPVEG

### PcCesA2 (Cellulose synthase A2)

#### >PcCesA2

MYGNDKQSLM KHEDYELHGT PATGDNDGGA GFYAQEGRPM MQQGYVDPR **G PALPPMNVSD**  
**AVGLGSQR**DN IISVHGYMHK QGKRTIKGPI HSKWKRRYFA LEKAKIYYFH SHLECRQYFT  
TR**NADLVVGA IELK**DALQLR PCARLDLPHK GFEVHTKRRV WVLCPETDDE  
YRMWFQGVVER **AIVANGAGNI IER**KLPNVRK YLMKGNQTYR FFYFLFLIAG IVELLAIVFW  
FVIGLEPCDA SRLEVDCETI TITSLETLRC SAQPFSGWFT PPNWYLK **IAD VENVQCFR**DP  
PIPQWVSFYA MLFAEILTFA LGVLYYLGWV KPVRR **GAHYF DEFEPVPDE LWP**KVDVLLC  
HYSEPAEETI DTLMACMNLQ YPPHLLQIYW CDDGYCKAKW TKGPNVPTVE LNK **GILETAG**  
**DLRQEVAQFM YDR**VCDPNED MEVYAWRKLH SSANLPSPSR VKVVNRADCA VGSFRDDYRY  
PGLPHVTFIG RVKPDVHYSK AGNINNCLYN EGANGR **YLI LDTMQPHPK FILATLPFFF**  
**DDEDRODK**AK YICCGIGCNA VAKLCCASCQ IAGVPEEQIS YCSKDCFENA MHVQSAVHRR  
QVNGTMSETR QSKIDMRMN CDSKLPKNGV CRKCGNKGAD GEDVSSLHTY SDDVKDNAVA  
FVQTPQYFRD CIQLQIGDPM GHRNATFYDA IQTGQDGYDC ASFAGTNAMF RREALDSIGG  
IQYGLSTEDC YTGQVLCSMG WKAQYFRKDF EGEPSEIR **L AEGLIPDSVA GSLAQR**KRWA  
KGNFQIALMN KKTQYFDPEW KLPEAQVPSY HSKSNFMRRV FYFNSTLYPL GSITAILFYY  
ITLYFLYSGY APIYMAGARL VYALVPK **LFV QGVLSALSNR** TVENS DVIRS QEVWFAYFT  
NCTAVLEAFW WKITGKEPKW FNTGGASRG TAELPNVIF FGTVVGLWS VVRFLAGYNS  
IQTSHGASLL FASLMMGLFI AVKLAPSVRM SIQEYFGWSY ESLTDQGNV GSISIAFGLV  
FITLWVWIEE PTSNPF

### PcCesA4 (Cellulose synthase A4)

#### >PcCesA4

MANRQPPGLG ALPEDAQYSQ TPLSGVQYHE QLSSAAAPGK KLLSQSTMDV QNTINELTKA  
KEHEELGKIT VHGWMHKQGS RKFKGPVAKS WRKRYFALEG AKMYFHSDV DCRKYFNSRN  
GELVVGAVDL RDAFKLEQSE RLDLPARGIV IHTRHRAWLV CPETDQDFTM WFDALLEFTVM  
SAGSGNVVQR DLPNVRVYEM KGRFSYRFWY VIFVITALIE LAGIVLWFPL GIEPCDVKYK  
TDESCDEIQLL YADTLQCQDK PFNGVWDPQ WYHWSAGIET VQCFKEPHIG DWVSYFLFYL  
AEFISISLGF LYYLGMWKPV RRGARYLRDF EPHFPPEKWP TVDILLCHYA EPAEDTIATL  
EKIMNLDYPP HLFHVWICDD GYCKSKWEAG AQVPK **VSVNT GVIEEAGDVR** HEVAQFMYDR

|            |              |            |            |             |            |            |
|------------|--------------|------------|------------|-------------|------------|------------|
| VCESYELEVD | EWRKEHTTVK   | MPTNANPRIV | NRSDCAVGSV | RDDYHYHGLP  | KLTFVGRIKP |            |
| PVHHSKAGNI | NNVLYNEGAI   | GRYAIILDND | MKPHEMFIQA | TLPFFFFDAPQ | NSKITRCCAP |            |
| GCGDIGKICC | ALCQAAGVPE   | AQIMYCSKDC | YNASGHTKSS | VHRRQTQNTM  | SERMMCASCG |            |
| SKINQKKGLC | RKCNRAVSQR   | DSNQFVGVSA | DDYSDHVSVN | QVGYVQTPQY  | FEDCLQLRLG |            |
| DPCGHRNSTF | FDSAQTGMDG   | YDCASFAGTN | AIFRREALDS | VCGIQYGSLT  | EDAYTGKMMV |            |
| DKGWKGYFR  | KDLEGEADR    | IRLAEGAVPE | SVAAALAQR  | RWAKGNFQIF  | LRNKKSLVDP |            |
| EWTAPVVVLP | PKRKINKFMR   | WVFFMNLTVY | PIGSFPAIFF | FYITGYFLYT  | GQAPIYTSGL |            |
| RLLMALVPK  | I VAQSILSALS | NR         | TVDNDDVL   | RSQQTWFSYA  | FVHVMAVFET | IYWKITGKEA |
| TWANTGALGG | NSPMELPNLI   | VFLAMIFGMM | WDTVRYFAGY | NNAATTHGTP  | LYFASLFLGG |            |
| FLASQLGPMV | RMSLQTYFGW   | SHKSLTDQGN | IVGSFSLAFV | LIILCIWVYV  | ETPNHSIFG  |            |

**Figure S4. Peptides identified by mass spectrometric analysis of the different CesaA proteins that co-immunoprecipitate when using anti-*PcCesA1* antibodies and CHAPS extracts of mycelial microsomal membranes from *P. capsici* (see Materials and Methods (main text) for experimental details).**

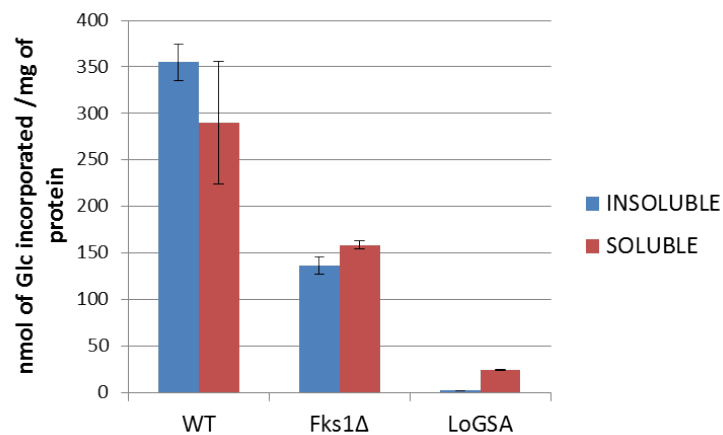

**Figure S5. *In vitro* glukan synthase activity of microsomal fractions isolated from *S. cerevisiae* BY4742 (wild-type), 4015251 (Fks1Δ) and LoGSA strains. The soluble and insoluble products formed in the reaction mixtures were quantified as detailed in Materials and Methods (see main text). Data represent the means and standard deviations of a representative experiment performed in triplicate.**

| > <i>PcCesA1</i> |            |            |            |            |            |            |            |
|------------------|------------|------------|------------|------------|------------|------------|------------|
| MFNKDQPVAV       | PPTDDYEMYA | TPSAMDIRQP | GETEIVRRSG | SPDPPHRPVN | SDEGGSFQDN |            |            |
| VITVHGYMHK       | QGKRAIKGPL | HKSWKRRYFA | LEKAKIYYFH | SHLECRQYFT | TRNTDLVVGA |            |            |
| TELKDALQLR       | PCARLDLPHR | GFEIMTKRRV | WVLCPETEEE | YRLWFEGVEE | AIVACGSGNI |            |            |
| IERKLPNVRK       | YYMKGITTYR | FLYFLFLILS | VVEIFGFVFW | FVVGTPQCD  | GNRTLACEDV |            |            |
| YDNTPDDLNC       | LAEPMSGWFT | PPDWYLTLAG | VDDVVCFHNP | PIAQWVSFFA | LIVAELVSMV |            |            |
| LGSLYYLGW        | KPVRR      | GAHYF      | DEFDPK     | VPDD       | LWPKIDVLLC | HYSEPAEETI | DTLMACMNLQ |
| YPPHLLQIYV       | LDDGYCSTKW | TK         | GNPVPAIE   | LNK        | VVLEKSG    | DLRQEVAQFM | YDRVCDPNED |
| MEVYAWR          | KLH        | SSANLPSASR | PKVVNRADCA | VGSFRDDYRY | PGLPHVTYVG | RVKPEMHYSK |            |
| AGNINNCLYN       | EGANGRYMLL | LDSDMQPHPK | FILATLPFFF | DDEDQYK    | NK         | YSCSCTGCQN |            |
| VAKMCCASCK       | IAGVPEERIS | YCSKECFENA | MHVQSDLHRR | QVNGTSLDVR | ATKKELRCMN |            |            |

CDSKLGKSGV CRKCNTNNNN GDTDVQILHT YSDDVR **DNAV GFVQTPQYFR DCVQLQIGDP**  
**LGHR**NSTFYD AIQTGQDGYD CASFAGTNAL IRREALDSIG GIQYGLTED CYTGERLVSM  
 GWKALYFR **KD FEGEAEER**VR **LAEGLIPDSV AGAMAQR**KRW AKGNFQTALM KKNKNVTDPE  
 WKRPHVDIPK YR**KPSNFM**R VFYLNSTLYP IDSIPVILLY YITLYFLYTG YAPIFVNGLR  
 ILVALVPK **LI VQGLLSALST RGVENNDVVR** SQETRFVYAF TNFTAMLGAI VWKFTGRKSR  
 WLNKRDATRG SLAELPNVLV FSGAVFGIIW AMVRYIVAYY NRVYSHGDSM LCAAILMGFY  
 IAYNLGPSVR MSIQEYFGWS YQSLMDQGNF MGSISIAVGL MFIALWVHVE KPVEG

**Figure S6. Peptides identified by mass spectrometric analysis of the recombinant *PcCesA1* protein purified by immobilized metal affinity chromatography (IMAC) (see Materials and Methods (main text) for experimental details).**

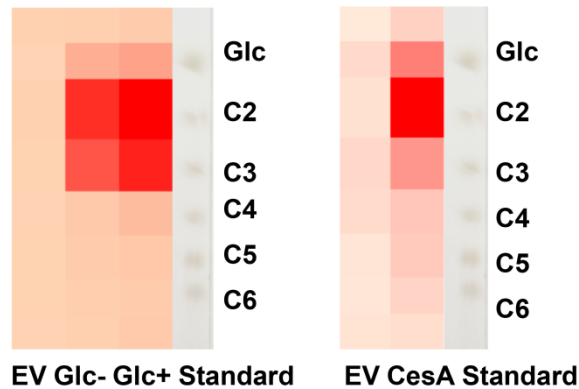

**Figure S7. TLC analysis of the water-soluble products formed *in vitro* by the recombinant *PcCesA1* protein in CHAPS-extracts of yeast microsomal membranes (left panel) or purified by IMAC (right panel).**

Radiometric quantification of Glc incorporation into soluble  $\beta$ -glucan products was performed after separation of the oligosaccharides synthesized *in vitro* by the recombinant *PcCesA1* protein in the presence of radiolabelled UDP-Glc, as described in Materials and Methods (main text). Glc-, reaction performed in the absence of added glucose. Glc+, reaction performed in the presence of 250  $\mu$ M glucose in the assay. The assay on the purified recombinant *PcCesA1* protein (CesA, right panel) was performed in the absence of added Glc. EV, control performed in the same conditions as for the CHAPS-extracted protein sample or the purified recombinant *PcCesA1* protein by using protein preparations from the yeast strain transformed with the empty expression vector. Standard, glucose (Glc) and celooligosaccharides of degrees of polymerization of 2 to 6 (C2-C6). Standards were run on the TLC plate at 1.5 mg mL<sup>-1</sup> and stained with H<sub>2</sub>SO<sub>4</sub> in ethanol. Sample lanes were cut into squares and analyzed radiometrically to locate the reaction products. The intensity of the red colour reflects the levels of radioactivity detected in each square.
